# Supplementary material for: Impact of Starch Concentration on the Pasting and Rheological Properties of Gluten-Free Gels. Effects of Amylose Content and Thermal and Hydration Properties
Source: MDPI journal article supplement (doi:10.3390/foods12122281), 2023-06-06
Supplement: s1 [file s1]

Table S1. Pasting properties of starches at the different studied concentrations.

| Conc. (%)    | PV<br>(mPa·s)              | TV<br>(mPa·s)             | BV<br>(mPa·s)            | FV<br>(mPa·s)              | SV<br>(mPa·s)             | Pt<br>(min)                | PT<br>(°C)                 |
|--------------|----------------------------|---------------------------|--------------------------|----------------------------|---------------------------|----------------------------|----------------------------|
| Wheat        |                            |                           |                          |                            |                           |                            |                            |
| 6.4          | 613 ± 20 <sup>eD</sup>     | 470 ± 18 <sup>eD</sup>    | 143 ± 7 <sup>cC</sup>    | 709 ± 22 <sup>fD</sup>     | 240 ± 24 <sup>eD</sup>    | 6.1 ± 0.1 <sup>bA</sup>    | 94.0 ± 0.8 <sup>aA</sup>   |
| 7.8          | 2261 ± 812 <sup>cdC</sup>  | 1773 ± 638 <sup>abC</sup> | 488 ± 176 <sup>eC</sup>  | 2515 ± 937 <sup>abcC</sup> | 742 ± 299 <sup>bcCD</sup> | 6.50 ± 0.05 <sup>bA</sup>  | 86 ± 3 <sup>bB</sup>       |
| 9.2          | 3002 ± 16 <sup>dC</sup>    | 2355 ± 40 <sup>bC</sup>   | 647 ± 34 <sup>efBC</sup> | 3370 ± 33 <sup>bcC</sup>   | 1015 ± 13 <sup>cC</sup>   | 6.53 ± 0.01 <sup>bA</sup>  | 83.20 ± 0.05 <sup>bB</sup> |
| 10.6         | 4576 ± 80 <sup>dB</sup>    | 3474 ± 132 <sup>bB</sup>  | 1102 ± 136 <sup>fB</sup> | 5557 ± 115 <sup>aB</sup>   | 2083 ± 74 <sup>bB</sup>   | 6.2 ± 0.1 <sup>bA</sup>    | 71.6 ± 0.4 <sup>dC</sup>   |
| 11.9         | 6900 ± 52 <sup>cdA</sup>   | 4780 ± 38 <sup>aA</sup>   | 2120 ± 25 <sup>eA</sup>  | 7922 ± 66 <sup>aA</sup>    | 3142 ± 29 <sup>aA</sup>   | 6.13 ± 0.1 <sup>aA</sup>   | 68.3 ± 0.5 <sup>eC</sup>   |
| Normal Maize |                            |                           |                          |                            |                           |                            |                            |
| 6.4          | 850 ± 18 <sup>dD</sup>     | 680 ± 10 <sup>dE</sup>    | 170 ± 9 <sup>cC</sup>    | 799 ± 26 <sup>eE</sup>     | 119 ± 17 <sup>fE</sup>    | 5.57 ± 0.07 <sup>cA</sup>  | 90.3 ± 0.4 <sup>bA</sup>   |
| 7.8          | 1651 ± 17 <sup>cdCD</sup>  | 1201 ± 32 <sup>bD</sup>   | 450 ± 30 <sup>eC</sup>   | 1600 ± 23 <sup>cdD</sup>   | 399 ± 24 <sup>cdD</sup>   | 5.51 ± 0.03 <sup>cA</sup>  | 84.5 ± 0.4 <sup>bB</sup>   |
| 9.2          | 2709 ± 5 <sup>dC</sup>     | 1731 ± 23 <sup>cC</sup>   | 977 ± 18 <sup>eBC</sup>  | 2694 ± 25 <sup>dC</sup>    | 962 ± 6 <sup>cC</sup>     | 5.31 ± 0.03 <sup>cA</sup>  | 78.33 ± 0.03 <sup>cC</sup> |
| 10.6         | 4115 ± 41 <sup>eB</sup>    | 2353 ± 91 <sup>dB</sup>   | 1762 ± 64 <sup>eB</sup>  | 3964 ± 71 <sup>cB</sup>    | 1611 ± 22 <sup>cB</sup>   | 4.97 ± 0.04 <sup>cB</sup>  | 76.9 ± 0.4 <sup>bC</sup>   |
| 11.9         | 6332 ± 110 <sup>deA</sup>  | 3087 ± 142 <sup>bA</sup>  | 3245 ± 66 <sup>cdA</sup> | 5310 ± 149 <sup>cA</sup>   | 2223 ± 15 <sup>bA</sup>   | 4.58 ± 0.04 <sup>bC</sup>  | 75.9 ± 0.7 <sup>bC</sup>   |
| Waxy maize   |                            |                           |                          |                            |                           |                            |                            |
| 6.4          | 1791 ± 19 <sup>bE</sup>    | 879 ± 9 <sup>cB</sup>     | 911 ± 10 <sup>bE</sup>   | 962 ± 10 <sup>dE</sup>     | 82 ± 5 <sup>fB</sup>      | 4.07 ± 0.01 <sup>dA</sup>  | 74.8 ± 0.5 <sup>cA</sup>   |
| 7.8          | 2700 ± 10 <sup>bcD</sup>   | 1165 ± 21 <sup>bAB</sup>  | 1535 ± 12 <sup>cD</sup>  | 1327 ± 1 <sup>dD</sup>     | 161 ± 21 <sup>dB</sup>    | 3.91 ± 0.03 <sup>eB</sup>  | 74.1 ± 0.5 <sup>cAB</sup>  |
| 9.2          | 3627 ± 45 <sup>cC</sup>    | 1393 ± 39 <sup>dA</sup>   | 2234 ± 40 <sup>cC</sup>  | 1741 ± 15 <sup>eC</sup>    | 348 ± 31 <sup>dB</sup>    | 3.84 ± 0.04 <sup>eB</sup>  | 73.7 ± 0.4 <sup>dB</sup>   |
| 10.6         | 4605 ± 13 <sup>dB</sup>    | 1579 ± 54 <sup>eA</sup>   | 3026 ± 54 <sup>cB</sup>  | 2148 ± 62 <sup>eB</sup>    | 569 ± 115 <sup>eAB</sup>  | 3.71 ± 0.03 <sup>eC</sup>  | 72.9 ± 0.5 <sup>cC</sup>   |
| 11.9         | 5664 ± 51 <sup>fA</sup>    | 1645 ± 439 <sup>cA</sup>  | 4020 ± 411 <sup>cA</sup> | 2643 ± 66 <sup>eA</sup>    | 998 ± 461 <sup>cdA</sup>  | 3.68 ± 0.05 <sup>dC</sup>  | 73.0 ± 0.5 <sup>cC</sup>   |
| Normal rice  |                            |                           |                          |                            |                           |                            |                            |
| 6.4          | 784 ± 6 <sup>dE</sup>      | 666 ± 19 <sup>dE</sup>    | 118 ± 16 <sup>cB</sup>   | 1464 ± 26 <sup>cE</sup>    | 797 ± 17 <sup>aD</sup>    | 6.82 ± 0.07 <sup>aA</sup>  | 94.73 ± 0.05 <sup>aA</sup> |
| 7.8          | 1565 ± 21 <sup>dD</sup>    | 1438 ± 11 <sup>bD</sup>   | 127 ± 19 <sup>eB</sup>   | 2435 ± 28 <sup>abcdD</sup> | 997 ± 28 <sup>bD</sup>    | 7.0 ± 0.1 <sup>aA</sup>    | 94.0 ± 0.5 <sup>aA</sup>   |
| 9.2          | 2690 ± 22 <sup>dC</sup>    | 2352 ± 47 <sup>bC</sup>   | 338 ± 50 <sup>fB</sup>   | 3814 ± 33 <sup>abC</sup>   | 1462 ± 42 <sup>bC</sup>   | 6.92 ± 0.08 <sup>aA</sup>  | 84.4 ± 0.5 <sup>aB</sup>   |
| 10.6         | 4023 ± 120 <sup>eB</sup>   | 3137 ± 120 <sup>cB</sup>  | 886 ± 0 <sup>fB</sup>    | 5172 ± 135 <sup>bB</sup>   | 2035 ± 15 <sup>bB</sup>   | 6.64 ± 0.05 <sup>aAB</sup> | 83.20 ± 0.07 <sup>aB</sup> |
| 11.9         | 5752 ± 71 <sup>efA</sup>   | 3759 ± 78 <sup>bA</sup>   | 1993 ± 6 <sup>eA</sup>   | 6418 ± 200 <sup>bA</sup>   | 2659 ± 122 <sup>abA</sup> | 6.14 ± 0.09 <sup>aB</sup>  | 81.9 ± 0.6 <sup>aB</sup>   |
| Waxy rice    |                            |                           |                          |                            |                           |                            |                            |
| 6.4          | 1583 ± 43 <sup>cE</sup>    | 1435 ± 36 <sup>bE</sup>   | 148 ± 23 <sup>cE</sup>   | 1928 ± 34 <sup>bE</sup>    | 493 ± 21 <sup>cD</sup>    | 5.37 ± 0.26 <sup>cA</sup>  | 71.88 ± 0.05 <sup>dA</sup> |
| 7.8          | 3392 ± 42 <sup>bD</sup>    | 2439 ± 58 <sup>aD</sup>   | 954 ± 16 <sup>dD</sup>   | 3389 ± 35 <sup>aD</sup>    | 950 ± 24 <sup>bcC</sup>   | 4.45 ± 0.04 <sup>dB</sup>  | 70.7 ± 0.5 <sup>cdB</sup>  |
| 9.2          | 4812 ± 48 <sup>bC</sup>    | 3167 ± 62 <sup>aC</sup>   | 1645 ± 28 <sup>dC</sup>  | 4318 ± 37 <sup>aC</sup>    | 1151 ± 28 <sup>bcB</sup>  | 4.24 ± 0.04 <sup>dB</sup>  | 70.4 ± 0.4 <sup>eB</sup>   |
| 10.6         | 6106 ± 73 <sup>cB</sup>    | 3876 ± 53 <sup>aB</sup>   | 2230 ± 29 <sup>dB</sup>  | 5159 ± 70 <sup>bB</sup>    | 1284 ± 23 <sup>dB</sup>   | 4.07 ± 0.1 <sup>dB</sup>   | 70.23 ± 0.06 <sup>eB</sup> |
| 11.9         | 7408 ± 11 <sup>cA</sup>    | 4666 ± 48 <sup>aA</sup>   | 2742 ± 59 <sup>deA</sup> | 6223 ± 22 <sup>bA</sup>    | 1557 ± 49 <sup>cA</sup>   | 4.09 ± 0.03 <sup>cB</sup>  | 70.27 ± 0.03 <sup>dB</sup> |
| Potato       |                            |                           |                          |                            |                           |                            |                            |
| 6.4          | 6763 ± 160 <sup>aC</sup>   | 1962 ± 37 <sup>aA</sup>   | 4801 ± 131 <sup>aB</sup> | 2270 ± 37 <sup>aB</sup>    | 308 ± 1 <sup>dB</sup>     | 3.05 ± 0.04 <sup>eA</sup>  | 67.00 ± 0.05 <sup>eA</sup> |
| 7.8          | 9459 ± 395 <sup>aB</sup>   | 1394 ± 157 <sup>bA</sup>  | 8065 ± 544 <sup>aA</sup> | 2877 ± 67 <sup>abAB</sup>  | 1483 ± 132 <sup>aAB</sup> | 2.85 ± 0.04 <sup>fB</sup>  | 66.7 ± 0.6 <sup>dAB</sup>  |
| 9.2          | 9425 ± 286 <sup>aAB</sup>  | 1319 ± 225 <sup>dA</sup>  | 8106 ± 289 <sup>aA</sup> | 3495 ± 497 <sup>bA</sup>   | 2176 ± 367 <sup>aA</sup>  | 2.73 ± 0.01 <sup>gBC</sup> | 66.6 ± 0.5 <sup>fAB</sup>  |
| 10.6         | 10669 ± 215 <sup>aAB</sup> | 1536 ± 235 <sup>eA</sup>  | 9133 ± 450 <sup>aA</sup> | 3203 ± 266 <sup>dAB</sup>  | 1667 ± 31 <sup>cAB</sup>  | 2.70 ± 0.04 <sup>gBC</sup> | 66.15 ± 0.1 <sup>fAB</sup> |
| 11.9         | 10998 ± 751 <sup>aA</sup>  | 1869 ± 125 <sup>cA</sup>  | 9129 ± 793 <sup>aA</sup> | 2695 ± 193 <sup>eAB</sup>  | 826 ± 219 <sup>dAB</sup>  | 2.69 ± 0.03 <sup>fC</sup>  | 66.14 ± 0.09 <sup>fB</sup> |
| Tapioca      |                            |                           |                          |                            |                           |                            |                            |
| 6.4          | 1693 ± 52 <sup>bcE</sup>   | 841 ± 27 <sup>cB</sup>    | 853 ± 38 <sup>bD</sup>   | 1454 ± 24 <sup>cE</sup>    | 614 ± 9 <sup>bB</sup>     | 4.15 ± 0.04 <sup>dA</sup>  | 71.3 ± 0.5 <sup>dA</sup>   |
| 7.8          | 3287 ± 28 <sup>bD</sup>    | 1270 ± 10 <sup>bAB</sup>  | 2017 ± 19 <sup>bC</sup>  | 2194 ± 19 <sup>bcdD</sup>  | 924 ± 11 <sup>bB</sup>    | 3.89 ± 0.03 <sup>eB</sup>  | 71.3 ± 0.3 <sup>cA</sup>   |
| 9.2          | 5096 ± 31 <sup>bC</sup>    | 1727 ± 31 <sup>cA</sup>   | 3369 ± 4 <sup>bB</sup>   | 2825 ± 73 <sup>cdC</sup>   | 1098 ± 103 <sup>bcB</sup> | 3.60 ± 0.01 <sup>fC</sup>  | 71.03 ± 0.03 <sup>eA</sup> |
| 10.6         | 7200 ± 54 <sup>bB</sup>    | 743 ± 23 <sup>fB</sup>    | 6457 ± 76 <sup>bA</sup>  | 3799 ± 37 <sup>cB</sup>    | 3056 ± 15 <sup>aA</sup>   | 3.40 ± 0.01 <sup>fD</sup>  | 71.05 ± 0.1 <sup>deA</sup> |
| 11.9         | 9104 ± 9 <sup>bA</sup>     | 1593 ± 54 <sup>cAB</sup>  | 7511 ± 62 <sup>bA</sup>  | 4450 ± 83 <sup>dA</sup>    | 2857 ± 78 <sup>abA</sup>  | 3.25 ± 0.04 <sup>eE</sup>  | 70.3 ± 0.9 <sup>dA</sup>   |

Conc. (%) = Concentration, expressed as % w/w gel; PV = Peak Viscosity; TV = Trough Viscosity; BDV= Breakdown Viscosity; FV = Final Viscosity; SBV= Setback Viscosity; PT = Peak Time; PTemp = Pasting Temperature. The presented data are the mean ± standard deviation. Different letters in each column indicate significant differences between means at p < 0.05. Lowercase letters compare samples at the same concentration, while capital letters compare samples of the same botanical origin.

Table S2. Rheological properties obtained from frequency sweeps of gels made with starches at different concentrations.

| Conc. (%)    | G' <sub>1</sub> (Pa)     | a                             | G'' <sub>1</sub> (Pa) | b                           | tan(δ) <sub>1</sub>       | c                          |
|--------------|--------------------------|-------------------------------|-----------------------|-----------------------------|---------------------------|----------------------------|
| Wheat        |                          |                               |                       |                             |                           |                            |
| 6.4          | 43 ± 1 <sup>cB</sup>     | 0.26 ± 0.01 <sup>aA</sup>     | 20 ± 1 <sup>aC</sup>  | 0.38 ± 0.01 <sup>bcA</sup>  | 0.46± 0.01 <sup>bA</sup>  | 0.12 ± 0.01 <sup>cB</sup>  |
| 7.8          | 304 ± 10 <sup>bB</sup>   | -0.08 ± 0.01 <sup>eB</sup>    | 46 ± 2 <sup>aB</sup>  | 0.27 ± 0.01 <sup>fB</sup>   | 0.15± 0.01 <sup>dB</sup>  | 0.35 ± 0.01 <sup>aA</sup>  |
| 9.2          | 1292 ± 53 <sup>aA</sup>  | -0.09 ± 0.01 <sup>fB</sup>    | 70 ± 2 <sup>aA</sup>  | 0.23 ± 0.01 <sup>eB</sup>   | 0.05± 0.01 <sup>fB</sup>  | 0.32 ± 0.01 <sup>aAB</sup> |
| 10.6         | 1926 ± 149 <sup>aA</sup> | -0.03 ± 0.01 <sup>eB</sup>    | 84 ± 5 <sup>aA</sup>  | 0.21 ± 0.01 <sup>dB</sup>   | 0.04± 0.01 <sup>fB</sup>  | 0.24 ± 0.01 <sup>bAB</sup> |
| 11.9         | 1949 ± 66 <sup>aA</sup>  | -0.011 ± 0.001 <sup>eAB</sup> | 83 ± 3 <sup>aA</sup>  | 0.23 ± 0.01 <sup>fB</sup>   | 0.04± 0.01 <sup>eB</sup>  | 0.24 ± 0.01 <sup>bAB</sup> |
| Normal Maize |                          |                               |                       |                             |                           |                            |
| 6.4          | 137 ± 6 <sup>aD</sup>    | -0.06 ± 0.01 <sup>dB</sup>    | 14 ± 1 <sup>bD</sup>  | 0.32 ± 0.01 <sup>eA</sup>   | 0.10± 0.01 <sup>fA</sup>  | 0.38 ± 0.01 <sup>aA</sup>  |
| 7.8          | 641 ± 8 <sup>aC</sup>    | -0.07 ± 0.01 <sup>eB</sup>    | 23 ± 1 <sup>bC</sup>  | 0.28 ± 0.01 <sup>fA</sup>   | 0.04± 0.01 <sup>fB</sup>  | 0.35 ± 0.01 <sup>aAB</sup> |
| 9.2          | 998 ± 70 <sup>bB</sup>   | -0.011 ± 0.001 <sup>eA</sup>  | 33 ± 2 <sup>bB</sup>  | 0.28 ± 0.01 <sup>dA</sup>   | 0.03± 0.01 <sup>fB</sup>  | 0.29 ± 0.01 <sup>bC</sup>  |
| 10.6         | 1244 ± 19 <sup>bAB</sup> | -0.006 ± 0.001 <sup>eA</sup>  | 37 ± 1 <sup>bB</sup>  | 0.29 ± 0.01 <sup>cA</sup>   | 0.03± 0.01 <sup>fB</sup>  | 0.29 ± 0.01 <sup>aBC</sup> |
| 11.9         | 1403 ± 73 <sup>bA</sup>  | 0.003 ± 0.001 <sup>eA</sup>   | 45 ± 2 <sup>cA</sup>  | 0.31 ± 0.01 <sup>dA</sup>   | 0.03± 0.01 <sup>eB</sup>  | 0.31 ± 0.01 <sup>aBC</sup> |
| Waxy maize   |                          |                               |                       |                             |                           |                            |
| 6.4          | 6 ± 1 <sup>cC0</sup>     | 0.21 ± 0.02 <sup>bC</sup>     | 3 ± 1 <sup>eC</sup>   | 0.46 ± 0.01 <sup>aB</sup>   | 0.49± 0.01 <sup>aC</sup>  | 0.25 ± 0.03 <sup>bA</sup>  |
| 7.8          | 8 ± 1 <sup>eB</sup>      | 0.29 ± 0.02 <sup>aB</sup>     | 5 ± 1 <sup>fB</sup>   | 0.45 ± 0.01 <sup>aB</sup>   | 0.57± 0.01 <sup>aB</sup>  | 0.16 ± 0.03 <sup>dB</sup>  |
| 9.2          | 9 ± 1 <sup>eB</sup>      | 0.31 ± 0.01 <sup>aB</sup>     | 6 ± 1 <sup>fB</sup>   | 0.47 ± 0.01 <sup>aAB</sup>  | 0.62± 0.015 <sup>aB</sup> | 0.16 ± 0.01 <sup>dB</sup>  |
| 10.6         | 9 ± 1 <sup>dB</sup>      | 0.31 ± 0.01 <sup>aB</sup>     | 6 ± 1 <sup>dB</sup>   | 0.47 ± 0.01 <sup>aAB</sup>  | 0.62± 0.02 <sup>aB</sup>  | 0.16 ± 0.01 <sup>cB</sup>  |
| 11.9         | 11 ± 1 <sup>eA</sup>     | 0.37 ± 0.02 <sup>aA</sup>     | 8 ± 1 <sup>fA</sup>   | 0.48 ± 0.01 <sup>aA</sup>   | 0.73± 0.014 <sup>aA</sup> | 0.12 ± 0.02 <sup>cB</sup>  |
| Normal rice  |                          |                               |                       |                             |                           |                            |
| 6.4          | 90 ± 9 <sup>bD</sup>     | 0.08 ± 0.01 <sup>cA</sup>     | 11 ± 1 <sup>cE</sup>  | 0.36 ± 0.01 <sup>cdA</sup>  | 0.13± 0.01 <sup>eA</sup>  | 0.28 ± 0.01 <sup>bA</sup>  |
| 7.8          | 164 ± 3 <sup>cC</sup>    | 0.08 ± 0.01 <sup>dA</sup>     | 19 ± 1 <sup>cD</sup>  | 0.36 ± 0.01 <sup>dA</sup>   | 0.11± 0.01 <sup>eA</sup>  | 0.28 ± 0.01 <sup>bA</sup>  |
| 9.2          | 254 ± 7 <sup>cB</sup>    | 0.07 ± 0.01 <sup>dA</sup>     | 27 ± 1 <sup>cC</sup>  | 0.36 ± 0.01 <sup>bcA</sup>  | 0.11± 0.01 <sup>eA</sup>  | 0.28 ± 0.01 <sup>bA</sup>  |
| 10.6         | 302 ± 22 <sup>cB</sup>   | 0.08 ± 0.01 <sup>dA</sup>     | 34 ± 1 <sup>bcB</sup> | 0.36 ± 0.01 <sup>bA</sup>   | 0.11± 0.01 <sup>eA</sup>  | 0.28 ± 0.01 <sup>aA</sup>  |
| 11.9         | 357 ± 29 <sup>cA</sup>   | 0.08 ± 0.01 <sup>dA</sup>     | 41 ± 2 <sup>cA</sup>  | 0.36 ± 0.01 <sup>cA</sup>   | 0.12± 0.01 <sup>dA</sup>  | 0.28 ± 0.01 <sup>aA</sup>  |
| Waxy rice    |                          |                               |                       |                             |                           |                            |
| 6.4          | 139 ± 8 <sup>aB</sup>    | 0.11 ± 0.01 <sup>cC</sup>     | 20 ± 1 <sup>aD</sup>  | 0.35 ± 0.01 <sup>dA</sup>   | 0.15± 0.01 <sup>dD</sup>  | 0.25 ± 0.01 <sup>bA</sup>  |
| 7.8          | 161 ± 3 <sup>aA</sup>    | 0.11 ± 0.01 <sup>cC</sup>     | 24 ± 1 <sup>bC</sup>  | 0.33 ± 0.01 <sup>eB</sup>   | 0.15± 0.01 <sup>dCD</sup> | 0.22 ± 0.01 <sup>cB</sup>  |
| 9.2          | 157 ± 4 <sup>dAB</sup>   | 0.12 ± 0.01 <sup>cB</sup>     | 27 ± 1 <sup>cC</sup>  | 0.31 ± 0.01 <sup>cdC</sup>  | 0.17± 0.01 <sup>dC</sup>  | 0.19 ± 0.01 <sup>cC</sup>  |
| 10.6         | 157 ± 9 <sup>cdAB</sup>  | 0.14 ± 0.01 <sup>cAB</sup>    | 30 ± 2 <sup>bcB</sup> | 0.29 ± 0.01 <sup>cD</sup>   | 0.19± 0.01 <sup>dB</sup>  | 0.15 ± 0.02 <sup>cD</sup>  |
| 11.9         | 154 ± 7 <sup>dAB</sup>   | 0.15 ± 0.01 <sup>cA</sup>     | 33 ± 2 <sup>dA</sup>  | 0.27 ± 0.01 <sup>eE</sup>   | 0.22± 0.01 <sup>cA</sup>  | 0.12 ± 0.01 <sup>cE</sup>  |
| Potato       |                          |                               |                       |                             |                           |                            |
| 6.4          | 25 ± 1 <sup>dB</sup>     | 0.24 ± 0.01 <sup>abA</sup>    | 10 ± 1 <sup>cB</sup>  | 0.36 ± 0.01 <sup>cdAB</sup> | 0.41± 0.01 <sup>cA</sup>  | 0.12 ± 0.01 <sup>cB</sup>  |
| 7.8          | 31 ± 1 <sup>dB</sup>     | 0.25 ± 0.01 <sup>bA</sup>     | 14 ± 1 <sup>dB</sup>  | 0.37 ± 0.01 <sup>cAB</sup>  | 0.43± 0.01 <sup>cA</sup>  | 0.12 ± 0.01 <sup>eB</sup>  |
| 9.2          | 44 ± 5 <sup>eB</sup>     | 0.25 ± 0.03 <sup>bA</sup>     | 18 ± 2 <sup>dB</sup>  | 0.37 ± 0.03 <sup>bA</sup>   | 0.41± 0.01 <sup>cA</sup>  | 0.13 ± 0.01 <sup>eB</sup>  |
| 10.6         | 64 ± 3 <sup>cdB</sup>    | 0.23 ± 0.01 <sup>bAB</sup>    | 25 ± 1 <sup>cB</sup>  | 0.36 ± 0.01 <sup>bAB</sup>  | 0.38± 0.01 <sup>cA</sup>  | 0.13 ± 0.01 <sup>cAB</sup> |
| 11.9         | 260 ± 21 <sup>cdA</sup>  | 0.13 ± 0.01 <sup>cB</sup>     | 53 ± 2 <sup>bA</sup>  | 0.27 ± 0.01 <sup>eB</sup>   | 0.21± 0.01 <sup>cB</sup>  | 0.14 ± 0.01 <sup>cA</sup>  |
| Tapioca      |                          |                               |                       |                             |                           |                            |
| 6.4          | 14 ± 1 <sup>deD</sup>    | 0.25 ± 0.02 <sup>aD</sup>     | 7 ± 1 <sup>dE</sup>   | 0.40 ± 0.01 <sup>bD</sup>   | 0.48± 0.01 <sup>abD</sup> | 0.14 ± 0.02 <sup>cA</sup>  |
| 7.8          | 16 ± 1 <sup>cC</sup>     | 0.26 ± 0.01 <sup>bCD</sup>    | 8 ± 1 <sup>eD</sup>   | 0.42 ± 0.01 <sup>bC</sup>   | 0.50± 0.01 <sup>bC</sup>  | 0.16 ± 0.01 <sup>dA</sup>  |
| 9.2          | 20 ± 1 <sup>eB</sup>     | 0.28 ± 0.01 <sup>aBC</sup>    | 10 ± 1 <sup>eC</sup>  | 0.43 ± 0.01 <sup>aB</sup>   | 0.52± 0.01 <sup>bB</sup>  | 0.15 ± 0.01 <sup>dA</sup>  |
| 10.6         | 21 ± 1 <sup>dB</sup>     | 0.30 ± 0.01 <sup>aAB</sup>    | 12 ± 1 <sup>dB</sup>  | 0.45 ± 0.01 <sup>aA</sup>   | 0.55± 0.01 <sup>bA</sup>  | 0.14 ± 0.01 <sup>cA</sup>  |
| 11.9         | 27 ± 1 <sup>eA</sup>     | 0.31 ± 0.01 <sup>bA</sup>     | 15 ± 1 <sup>eA</sup>  | 0.45 ± 0.01 <sup>bA</sup>   | 0.56± 0.01 <sup>bA</sup>  | 0.14 ± 0.01 <sup>cA</sup>  |

Conc. (%) = Concentration, expressed as % w/w gel; G'<sub>1</sub>, G''<sub>1</sub> and tan(δ)<sub>1</sub> represent the elastic and viscous moduli, and the loss tangent at 1 Hz, respectively, obtained by fitting the data from the frequency sweeps to the power law model. The *a*, *b* and *c* values correspond to the exponents obtained from the fitting and quantify the dependence degree of dynamic moduli and loss tangent with the oscillation frequency. The presented data are the mean ± standard deviation. Different letters in each column indicate significant differences between means at *p* < 0.05. Lowercase letters compare samples at the same concentration, while capital letters compare samples of the same botanical origin.

Table S3. Deformation sweep values determined at 1 Hz.

| Conc. (%)    | Crossing Point Stress (Pa)   | Crossing Point strain (%)    | Max Stress ( $\tau_{\max}$ ) (Pa) | Max Strain (%)                   |
|--------------|------------------------------|------------------------------|-----------------------------------|----------------------------------|
| Wheat        |                              |                              |                                   |                                  |
| 6.4          | 53 $\pm$ 5 <sup>eE</sup>     | 172 $\pm$ 15 <sup>eC</sup>   | 37 $\pm$ 2 <sup>bE</sup>          | 72.25 $\pm$ 0.01 <sup>aC</sup>   |
| 7.8          | 639 $\pm$ 19 <sup>bD</sup>   | 186 $\pm$ 1 <sup>eC</sup>    | 684 $\pm$ 37 <sup>aD</sup>        | 101.95 $\pm$ 0.08 <sup>aB</sup>  |
| 9.2          | 1553 $\pm$ 32 <sup>aC</sup>  | 216 $\pm$ 4 <sup>cB</sup>    | 1554 $\pm$ 32 <sup>aC</sup>       | 101.1 $\pm$ 0.1 <sup>aB</sup>    |
| 10.6         | 2176 $\pm$ 84 <sup>aB</sup>  | 233 $\pm$ 10 <sup>cB</sup>   | 2396 $\pm$ 144 <sup>aB</sup>      | 141.6 $\pm$ 0.3 <sup>aA</sup>    |
| 11.9         | 2770 $\pm$ 83 <sup>aA</sup>  | 270 $\pm$ 2 <sup>cdA</sup>   | 2847 $\pm$ 98 <sup>aA</sup>       | 140.55 $\pm$ 0.09 <sup>aA</sup>  |
| Normal Maize |                              |                              |                                   |                                  |
| 6.4          | 212 $\pm$ 18 <sup>cD</sup>   | 165 $\pm$ 11 <sup>eC</sup>   | 148 $\pm$ 7 <sup>aD</sup>         | 51.85 $\pm$ 0.04 <sup>bB</sup>   |
| 7.8          | 711 $\pm$ 14 <sup>aC</sup>   | 195 $\pm$ 7 <sup>eB</sup>    | 583 $\pm$ 19 <sup>bC</sup>        | 72.37 $\pm$ 0.03 <sup>bB</sup>   |
| 9.2          | 1251 $\pm$ 66 <sup>bB</sup>  | 217 $\pm$ 7 <sup>cAB</sup>   | 1151 $\pm$ 43 <sup>bB</sup>       | 100.98 $\pm$ 0.07 <sup>aA</sup>  |
| 10.6         | 1454 $\pm$ 13 <sup>bB</sup>  | 241 $\pm$ 7 <sup>cA</sup>    | 1356 $\pm$ 58 <sup>bB</sup>       | 100.75 $\pm$ 0.01 <sup>bA</sup>  |
| 11.9         | 1867 $\pm$ 113 <sup>bA</sup> | 244 $\pm$ 16 <sup>cdA</sup>  | 1687 $\pm$ 79 <sup>bA</sup>       | 100.8 $\pm$ 0.1 <sup>bA</sup>    |
| Waxy maize   |                              |                              |                                   |                                  |
| 6.4          | 26 $\pm$ 2 <sup>fAB</sup>    | 552 $\pm$ 41 <sup>cA</sup>   | 2 $\pm$ 1 <sup>dC</sup>           | 39 $\pm$ 5 <sup>cA</sup>         |
| 7.8          | 33 $\pm$ 7 <sup>fAB</sup>    | 534 $\pm$ 15 <sup>cA</sup>   | 3 $\pm$ 1 <sup>dBC</sup>          | 38 $\pm$ 1 <sup>cA</sup>         |
| 9.2          | 45 $\pm$ 2 <sup>eA</sup>     | 550 $\pm$ 36 <sup>bA</sup>   | 4 $\pm$ 1 <sup>dB</sup>           | 37.285 $\pm$ 0.001 <sup>bA</sup> |
| 10.6         | 45 $\pm$ 2 <sup>eA</sup>     | 550 $\pm$ 36 <sup>bA</sup>   | 4 $\pm$ 1 <sup>cB</sup>           | 37.285 $\pm$ 0.001 <sup>dA</sup> |
| 11.9         | 21 $\pm$ 3 <sup>fB</sup>     | 181 $\pm$ 22 <sup>dB</sup>   | 5 $\pm$ 1 <sup>cA</sup>           | 37.285 $\pm$ 0.002 <sup>cA</sup> |
| Normal rice  |                              |                              |                                   |                                  |
| 6.4          | 104 $\pm$ 1 <sup>dD</sup>    | 325 $\pm$ 27 <sup>dA</sup>   | 33 $\pm$ 4 <sup>bB</sup>          | 37.327 $\pm$ 0.007 <sup>cA</sup> |
| 7.8          | 147 $\pm$ 13 <sup>dC</sup>   | 273 $\pm$ 12 <sup>dA</sup>   | 59 $\pm$ 1 <sup>cB</sup>          | 37.344 $\pm$ 0.005 <sup>cA</sup> |
| 9.2          | 215 $\pm$ 8 <sup>dB</sup>    | 258 $\pm$ 3 <sup>bcA</sup>   | 92 $\pm$ 3 <sup>cAB</sup>         | 37.339 $\pm$ 0.002 <sup>bA</sup> |
| 10.6         | 256 $\pm$ 1 <sup>dB</sup>    | 265 $\pm$ 7 <sup>cA</sup>    | 148 $\pm$ 11 <sup>cA</sup>        | 51.97 $\pm$ 0.01 <sup>cA</sup>   |
| 11.9         | 345 $\pm$ 17 <sup>eA</sup>   | 285 $\pm$ 20 <sup>cA</sup>   | 94 $\pm$ 7 <sup>cAB</sup>         | 26.855 $\pm$ 0.003 <sup>dA</sup> |
| Waxy rice    |                              |                              |                                   |                                  |
| 6.4          | 49 $\pm$ 2 <sup>eE</sup>     | 106 $\pm$ 5 <sup>eE</sup>    | 12 $\pm$ 1 <sup>cB</sup>          | 10.004 $\pm$ 0.001 <sup>fC</sup> |
| 7.8          | 90 $\pm$ 1 <sup>eD</sup>     | 152 $\pm$ 2 <sup>fD</sup>    | 36 $\pm$ 1 <sup>cdA</sup>         | 26.856 $\pm$ 0.003 <sup>dB</sup> |
| 9.2          | 120 $\pm$ 3 <sup>deC</sup>   | 187 $\pm$ 1 <sup>cC</sup>    | 38 $\pm$ 1 <sup>cdA</sup>         | 26.843 $\pm$ 0.001 <sup>cB</sup> |
| 10.6         | 159 $\pm$ 9 <sup>deB</sup>   | 233 $\pm$ 9 <sup>cB</sup>    | 51 $\pm$ 3 <sup>cA</sup>          | 37.308 $\pm$ 0.004 <sup>dA</sup> |
| 11.9         | 188 $\pm$ 6 <sup>eA</sup>    | 265 $\pm$ 8 <sup>cdA</sup>   | 51 $\pm$ 2 <sup>cA</sup>          | 37.301 $\pm$ 0.002 <sup>cA</sup> |
| Potato       |                              |                              |                                   |                                  |
| 6.4          | 262 $\pm$ 2 <sup>bD</sup>    | 1687 $\pm$ 37 <sup>bA</sup>  | 5 $\pm$ 1 <sup>cdB</sup>          | 19.312 $\pm$ 0.001 <sup>eA</sup> |
| 7.8          | 436 $\pm$ 22 <sup>cD</sup>   | 2254 $\pm$ 10 <sup>bA</sup>  | 6 $\pm$ 1 <sup>dB</sup>           | 19.315 $\pm$ 0.001 <sup>eA</sup> |
| 9.2          | 650 $\pm$ 43 <sup>cC</sup>   | 2527 $\pm$ 292 <sup>aA</sup> | 7 $\pm$ 1 <sup>dB</sup>           | 13.896 $\pm$ 0.001 <sup>dB</sup> |
| 10.6         | 850 $\pm$ 9 <sup>cB</sup>    | 2686 $\pm$ 55 <sup>aA</sup>  | 9 $\pm$ 1 <sup>cB</sup>           | 13.898 $\pm$ 0.001 <sup>fB</sup> |
| 11.9         | 1198 $\pm$ 85 <sup>cA</sup>  | 1415 $\pm$ 107 <sup>bA</sup> | 36 $\pm$ 3 <sup>cA</sup>          | 13.899 $\pm$ 0.001 <sup>fB</sup> |
| Tapioca      |                              |                              |                                   |                                  |
| 6.4          | 311 $\pm$ 2 <sup>aE</sup>    | 2286 $\pm$ 18 <sup>aC</sup>  | 4 $\pm$ 1 <sup>dC</sup>           | 26.839 $\pm$ 0.002 <sup>dA</sup> |
| 7.8          | 446 $\pm$ 9 <sup>cD</sup>    | 2450 $\pm$ 19 <sup>aBC</sup> | 5 $\pm$ 1 <sup>dBC</sup>          | 26.837 $\pm$ 0.001 <sup>dA</sup> |
| 9.2          | 619 $\pm$ 9 <sup>cC</sup>    | 2535 $\pm$ 45 <sup>aB</sup>  | 6 $\pm$ 1 <sup>dA</sup>           | 26.840 $\pm$ 0.001 <sup>cA</sup> |
| 10.6         | 718 $\pm$ 8 <sup>cB</sup>    | 2740 $\pm$ 106 <sup>aA</sup> | 5 $\pm$ 1 <sup>cBC</sup>          | 19.314 $\pm$ 0.001 <sup>eB</sup> |
| 11.9         | 919 $\pm$ 22 <sup>dA</sup>   | 2719 $\pm$ 16 <sup>aA</sup>  | 6 $\pm$ 1 <sup>cAB</sup>          | 19.312 $\pm$ 0.001 <sup>eB</sup> |

Conc. (%) = Concentration, expressed as % w/w gel. The presented data are the mean  $\pm$  standard deviation. Different letters in each column indicate significant differences between means at  $p < 0.05$ . Lowercase letters compare samples at the same concentration, while capital letters compare samples of the same botanical origin.
